# Supplementary material
Source: PubMed Central journal article supplement (PMC4066481)
Supplement: 1405454111_pnas.201405454SI.pdf [file 1405454111_pnas.201405454SI.pdf]

# Supporting Information

Pusceddu et al. 10.1073/pnas.1405454111

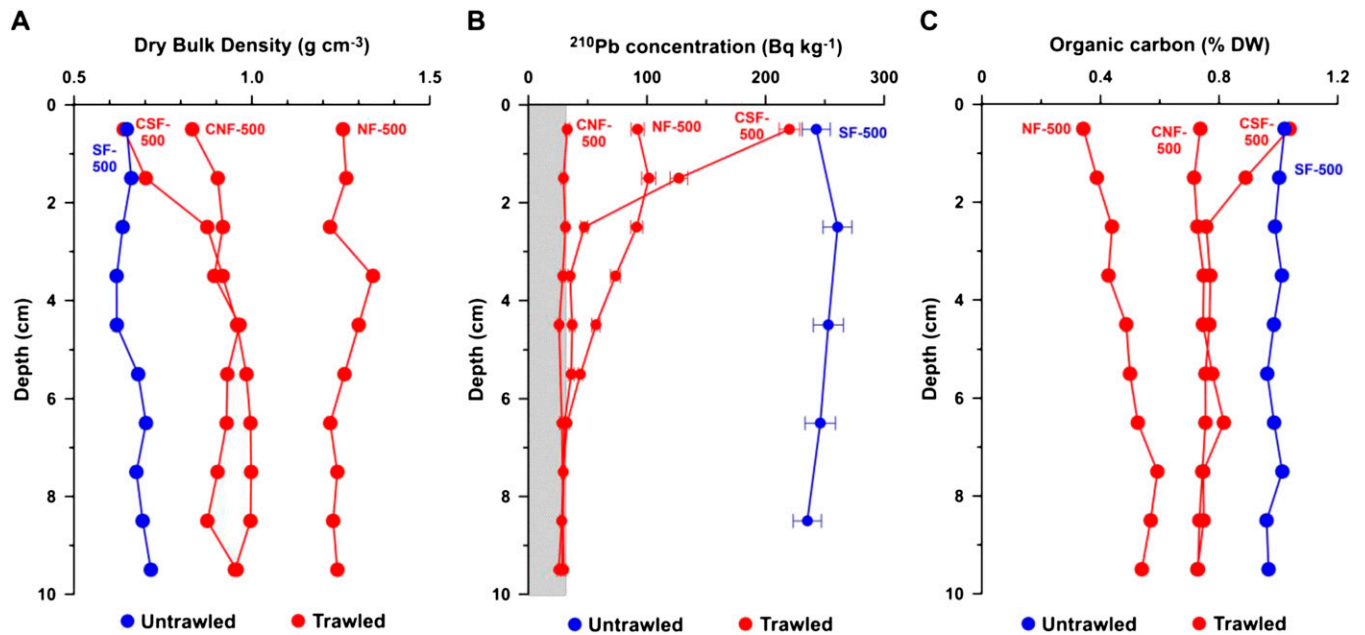

**Fig. S1.** Depth profiles of dry bulk density (A), total  $^{210}\text{Pb}$  concentrations (B), and organic C content [percentage of sediment dry weight (DW)] (C) in the surface sediments (0–10 cm) at the trawled and untrawled coring sites along the flanks of La Fonera Canyon. The gray area in B represents the estimated supported  $^{210}\text{Pb}$  concentration (in equilibrium with  $^{226}\text{Ra}$ ). Concentrations of  $^{210}\text{Pb}$  above that threshold are “in excess,” indicating net accumulation of recently deposited sediments (within the order of a century). Absence of excess  $^{210}\text{Pb}$  indicates that sediments are older than 100–150 y. See Fig. 1 for sampling locations and Table S1 for sampling codes.

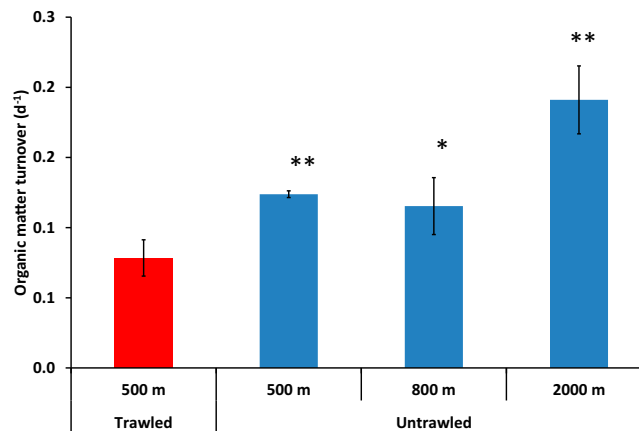

**Fig. S2.** Turnover of organic C ( $\pm$ SE) in the trawled and untrawled sediments. The turnover ( $\text{d}^{-1}$ ) of the biopolymeric C pools were calculated as the ratios of the biopolymeric C daily degradation rates (estimated from extracellular enzymatic activities; *Methods*) and the biopolymeric C contents in the sediment.





**Table S2. Permutational analyses of variance and the a posteriori pairwise tests for the quantity, composition, and turnover of the organic matter in the trawled and untrawled sediments at the different depths in La Fonera Canyon**

| Variable and source   | df | MS     | Pseudo-F | P(MC)       | Pairwise comparisons         | t     | P(MC)       |
|-----------------------|----|--------|----------|-------------|------------------------------|-------|-------------|
| <b>Biopolymeric C</b> |    |        |          |             |                              |       |             |
| Impact                | 3  | 2.775  | 3.781    | $P < 0.01$  | Trawled 500; untrawled 500   | 2.959 | $P < 0.05$  |
| Residual              | 20 | 0.734  |          |             | Trawled 500; untrawled 800   | 1.845 | NS          |
| Total                 | 23 |        |          |             | Trawled 500; untrawled 2,000 | 0.050 | NS          |
| <b>Phytopigment</b>   |    |        |          |             |                              |       |             |
| Impact                | 3  | 6.550  | 39.123   | $P < 0.001$ | Trawled 500; untrawled 500   | 8.917 | $P < 0.001$ |
| Residual              | 20 | 0.167  |          |             | Trawled 500; untrawled 800   | 7.540 | $P < 0.001$ |
| Total                 | 23 |        |          |             | Trawled 500; untrawled 2,000 | 3.129 | $P < 0.01$  |
| <b>OM composition</b> |    |        |          |             |                              |       |             |
| Impact                | 3  | 22.124 | 9.099    | $P < 0.001$ | Trawled 500; untrawled 500   | 4.618 | $P < 0.001$ |
| Residual              | 20 | 2.432  |          |             | Trawled 500; untrawled 800   | 2.878 | $P < 0.01$  |
| Total                 | 23 |        |          |             | Trawled 500; untrawled 2,000 | 1.362 | NS          |
| <b>OM turnover</b>    |    |        |          |             |                              |       |             |
| Impact                | 3  | 9.839  | 3.280    | $P < 0.001$ | Trawled 500; untrawled 500   | 7.990 | $P < 0.01$  |
| Residual              | 11 | 1.161  | 0.145    |             | Trawled 500; untrawled 800   | 2.659 | $P < 0.05$  |
| Total                 | 12 |        |          |             | Trawled 500; untrawled 2,000 | 7.109 | $P < 0.01$  |

Fixed levels of contrast include trawled sediments at 500 m in depth ( $n = 2$  replicate stations, 1 for organic matter turnover), untrawled sediments at 500 m in depth ( $n = 2$ , 1 for organic matter turnover), untrawled sediments at 800 m in depth ( $n = 3$ , 1 for organic matter turnover), and untrawled sediments at 2,000 m in depth ( $n = 1$ ). The multivariate test [permutational analyses of variance (PERMANOVA)] on the organic matter composition included the protein, carbohydrate, lipid, chlorophyll-*a*, and phytopigment concentrations. All analyses were carried out on normalized data, using unrestricted permutations of the raw data and 999 permutations. df, degrees of freedom; MS, mean square; NS, not significant; P(MC), probability level after Monte Carlo tests; pseudo-F, statistic *F*; *t*, statistic *t* for pairwise comparisons.

**Table S3. Total phytopigment contents along European continental margins**

| Area              | Date           | Latitude, °N | Longitude, °E°W | Depth, m | CPE, µg·g <sup>-1</sup> | ±SE  |
|-------------------|----------------|--------------|-----------------|----------|-------------------------|------|
| La Fonera Canyon  | May 2011       | See Table S1 | See Table S1    | 500      | 5.2                     | 0.7  |
| Catalan margin    | May 2006       | 35.147       | 23.714          | 2,420    | 45.4                    | 35.8 |
| Catalan margin    | April 2005     | 42.248       | 4.344           | 2,147    | 28.3                    | 19.9 |
| Catalan margin    | May 2006       | 35.052       | 23.492          | 3,600    | 24.2                    | 5.1  |
| Catalan margin    | May 2006       | 35.085       | 23.554          | 3,553    | 23.5                    | 4.6  |
| Catalan margin    | May 2006       | 34.883       | 24.548          | 2,669    | 20.5                    | 7.7  |
| Catalan margin    | May 2006       | 34.849       | 24.809          | 2,180    | 15.1                    | 3.8  |
| Catalan margin    | May 2006       | 34.603       | 24.143          | 3,617    | 12.1                    | 3.7  |
| Catalan margin    | October 2005   | 42.080       | 4.682           | 2,342    | 9.5                     | 2.1  |
| Malta Escarpment  | August 2005    | 36.818       | 15.362          | 2,325    | 16.8                    | 2.6  |
| Malta Escarpment  | August 2005    | 36.849       | 15.341          | 2,062    | 9.0                     | 5.6  |
| Nordic margin     | August 2005    | 78.780       | 5.333           | 2,468    | 44.2                    | 24.5 |
| Nordic margin     | August 2005    | 79.134       | 2.842           | 5,571    | 22.3                    | 7.3  |
| Nordic margin     | August 2005    | 79.067       | 4.170           | 2,545    | 16.0                    | 2.5  |
| Nordic margin     | August 2005    | 79.108       | 4.600           | 1,914    | 13.8                    | 2.0  |
| Nordic margin     | August 2005    | 78.610       | 5.070           | 2,339    | 11.9                    | 3.4  |
| Nordic margin     | August 2005    | 79.065       | 4.180           | 3,997    | 10.1                    | 5.6  |
| Nordic margin     | August 2005    | 79.283       | 4.328           | 2,397    | 8.0                     | 2.1  |
| Nordic margin     | August 2005    | 79.065       | 4.180           | 2,462    | 7.9                     | 2.6  |
| Nordic margin     | August 2005    | 79.065       | 4.180           | 2,462    | 7.9                     | 2.6  |
| Nordic margin     | August 2005    | 78.918       | 5.002           | 2,634    | 6.4                     | 1.8  |
| Portuguese margin | July 2005      | 39.500       | <b>9.940</b>    | 3,530    | 48.0                    | 1.6  |
| Portuguese margin | September 2006 | 38.363       | <b>9.510</b>    | 2,100    | 31.8                    | 3.6  |
| Portuguese margin | July 2005      | 39.594       | <b>10.321</b>   | 4,340    | 23.7                    | 2.7  |
| Portuguese margin | September 2006 | 39.504       | <b>9.843</b>    | 3,231    | 21.7                    | 2.3  |
| Portuguese margin | September 2006 | 39.593       | <b>10.333</b>   | 4,363    | 20.0                    | 7.4  |
| Portuguese margin | July 2005      | 38.356       | <b>9.979</b>    | 4,513    | 16.2                    | 3.5  |
| Portuguese margin | September 2006 | 37.833       | <b>9.515</b>    | 1,002    | 15.5                    | 3.2  |
| Portuguese margin | September 2006 | 38.312       | <b>9.703</b>    | 2,975    | 13.4                    | 3.1  |
| Portuguese margin | September 2006 | 40.166       | <b>10.167</b>   | 3,981    | 9.5                     | 1.1  |
| Portuguese margin | September 2006 | 37.833       | <b>10.083</b>   | 2,908    | 9.0                     | 0.9  |
| Portuguese margin | September 2006 | 38.333       | <b>9.858</b>    | 3,914    | 8.7                     | 0.8  |
| Portuguese margin | September 2006 | 39.177       | <b>10.666</b>   | 2,084    | 7.8                     | 3.5  |
| Portuguese margin | July 2005      | 40.078       | <b>10.376</b>   | 4,277    | 7.5                     | 0.5  |
| Portuguese margin | September 2006 | 37.833       | <b>9.750</b>    | 2,130    | 7.1                     | 1.8  |
| Portuguese margin | September 2006 | 37.833       | <b>11.000</b>   | 4,987    | 6.9                     | 2.2  |
| Portuguese margin | September 2006 | 40.167       | <b>10.000</b>   | 3,475    | 6.5                     | 2.6  |

Data from La Fonera Canyon are derived from mean ( $\pm$ SE) concentrations in trawled stations at 500 m in depth in La Fonera Canyon. Data from the Catalan, Nordic, and Portuguese margin are from ref. 1. The data from the Malta Escarpment are deposited in <http://doi.pangaea.de/10.1594/PANGAEA.681264>. Bolded values indicate western longitude. CPE, total phytopigment concentration.

1. Pusceddu A, et al. (2010) Organic matter in sediments of canyons and open slopes of the Portuguese, Catalan, southern Adriatic and Cretan Sea margins. *Deep Sea Res Part 1 Oceanogr Res Pap* 57(3):441–457.

**Table S4. PERMANOVA and pairwise tests for the total meiofauna abundance, biomass, and richness of the higher taxa in trawled and untrawled sediments at different depths in La Fonera Canyon**

| Variable and source  | df | MS      | Pseudo-F | P(MC)       | Pairwise comparisons         | t     | P(MC)       |
|----------------------|----|---------|----------|-------------|------------------------------|-------|-------------|
| <b>Abundance</b>     |    |         |          |             |                              |       |             |
| Impact               | 3  | 2,456.3 | 31.298   | $P < 0.001$ | Trawled 500; untrawled 500   | 7.591 | $P < 0.001$ |
| Residual             | 20 | 78.5    |          |             | Trawled 500; untrawled 800   | 6.995 | $P < 0.001$ |
| Total                | 23 |         |          |             | Trawled 500; untrawled 2,000 | 3.017 | $P < 0.05$  |
| <b>Biomass</b>       |    |         |          |             |                              |       |             |
| Impact               | 3  | 1,331.6 | 24.866   | $P < 0.001$ | Trawled 500; untrawled 500   | 7.080 | $P < 0.001$ |
| Residual             | 20 | 53.6    |          |             | Trawled 500; untrawled 800   | 7.856 | $P < 0.001$ |
| Total                | 23 |         |          |             | Trawled 500; untrawled 2,000 | 2.991 | $P < 0.05$  |
| <b>Taxa richness</b> |    |         |          |             |                              |       |             |
| Impact               | 3  | 109.9   | 15.534   | $P < 0.001$ | Trawled 500; untrawled 500   | 5.862 | $P < 0.001$ |
| Residual             | 20 | 7.1     |          |             | Trawled 500; untrawled 800   | 3.369 | $P < 0.01$  |
| Total                | 23 |         |          |             | Trawled 500; untrawled 2,000 | 2.434 | $P < 0.05$  |

Fixed levels of contrast include trawled sediments at 500 m in depth ( $n = 2$  replicate stations), untrawled sediments at 500 m in depth ( $n = 2$ ), untrawled sediments at 800 m in depth ( $n = 3$ ), and untrawled sediments at 2,000 m in depth ( $n = 1$ ). Analyses were carried out on the fourth-root transformed data, using unrestricted permutations of the raw data and 999 permutations. df, degrees of freedom; MS, mean square; P(MC), probability level after Monte Carlo tests; Pseudo-F, statistic  $F$ ;  $t$ , statistic  $t$  for pairwise comparisons.

**Table S5. Multivariate PERMANOVA and pairwise tests on the composition of the meiofauna communities and nematode assemblages in trawled and untrawled sediments at different depths in La Fonera Canyon**

| Variable and source | df | MS   | Pseudo-F | P(MC)       | Contrast                       | t     | P(MC)      | $\beta$ |
|---------------------|----|------|----------|-------------|--------------------------------|-------|------------|---------|
| <b>Meiofauna</b>    |    |      |          |             |                                |       |            |         |
| Impact              | 3  | 1670 | 5.178    | $P < 0.001$ | Trawled 500; untrawled 500     | 3.097 | $P < 0.01$ | nc      |
| Residual            | 23 | 323  |          |             | Trawled 500; untrawled 800     | 2.069 | $P < 0.05$ | nc      |
| Total               | 26 |      |          |             | Trawled 500; untrawled 2,000   | 1.610 | NS         | nc      |
|                     |    |      |          |             | Untrawled 500; untrawled 800   | 2.266 | $P < 0.05$ | nc      |
|                     |    |      |          |             | Untrawled 500; untrawled 2,000 | 3.276 | $P < 0.01$ | nc      |
|                     |    |      |          |             | Untrawled 800; untrawled 2,000 | 1.302 | NS         | nc      |
| <b>Nematode</b>     |    |      |          |             |                                |       |            |         |
| Impact              | 3  | 4774 | 2.109    | $P < 0.001$ | Trawled 500; untrawled 500     | 1.761 | $P < 0.01$ | 37      |
| Residual            | 22 | 2264 |          |             | Trawled 500; untrawled 800     | 1.190 | NS         | 31      |
| Total               | 25 |      |          |             | Trawled 500; untrawled 2,000   | 1.483 | $P < 0.05$ | 27      |
|                     |    |      |          |             | Untrawled 500; untrawled 800   | 1.310 | NS         | 27      |
|                     |    |      |          |             | Untrawled 500; untrawled 2,000 | 1.730 | $P < 0.05$ | 31      |
|                     |    |      |          |             | Untrawled 800; untrawled 2,000 | 1.129 | NS         | 22      |

Fixed levels of contrast include trawled sediments at 500 m in depth ( $n = 2$ ; 5 replicate stations for meiofauna and nematodes, respectively), untrawled sediments at 500 m in depth ( $n = 2-4$ ), untrawled sediments at 800 m in depth ( $n = 3$ ), and untrawled sediments at 2,000 m in depth ( $n = 1$ ). Nematode data are presence-absence-transformed. Analyses were carried out using unrestricted permutations of the raw data and 999 permutations.  $\beta$ , turnover diversity of nematodes as Bray-Curtis dissimilarity percentage; df, degrees of freedom; MS, mean square; NS, not significant; P(MC), probability level after Monte Carlo tests; Pseudo-F, statistic  $F$ ;  $t$ , statistic  $t$  for pairwise comparisons; nc, not calculated.

**Table S6. Analysis of seasonal and interannual variability in Cap de Creus Canyon**

| Contrast, variable, and source                    | df | MS       | Pseudo-F | P(MC) |
|---------------------------------------------------|----|----------|----------|-------|
| <b>Interannual (2005, 2008, 2009)</b>             |    |          |          |       |
| Phytopigment content                              |    |          |          |       |
| Year                                              | 2  | 2.82     | 3.5357   | NS    |
| Residual                                          | 18 | 0.80     |          |       |
| Meiofauna abundance                               |    |          |          |       |
| Year                                              | 2  | 174.88   | 2.766    | NS    |
| Residual                                          | 18 | 63.23    |          |       |
| Meiofauna community structure                     |    |          |          |       |
| Year                                              | 2  | 1,010.70 | 2.2805   | NS    |
| Residual                                          | 18 | 443.20   |          |       |
| <b>Seasonal (April vs. October 2008 and 2009)</b> |    |          |          |       |
| Phytopigment content                              |    |          |          |       |
| Month                                             | 1  | 3.20     | 3.7047   | NS    |
| Residual                                          | 16 | 0.86     |          |       |
| Meiofauna abundance                               |    |          |          |       |
| Month                                             | 1  | 192.72   | 2.4693   | NS    |
| Residual                                          | 16 | 78.05    |          |       |
| Meiofauna community structure                     |    |          |          |       |
| Month                                             | 1  | 957.04   | 3.1359   | NS    |
| Residual                                          | 16 | 305.19   |          |       |

Reported are the results of PERMANOVA carried out to test the hypothesis of no significant interannual (2005, 2008, 2009) and seasonal (April 2008, October 2008, April 2009, October 2009) changes in the phytopigment contents, meiofaunal abundance, and meiofaunal community composition at 1,000 m in depth. Raw data are derived from ref. 1. PERMANOVAs on phytopigment contents and meiofaunal abundance have been carried out, after normalization and fourth-root transformation of the raw data, respectively, on resemblance matrixes based on Euclidean distances with unrestricted permutation of the data. Tests on meiofaunal composition have been carried out on fourth-root transformed data, using resemblance matrixes based on Bray–Curtis similarity values, with permutations of the residuals under a reduced model. df, degrees of freedom; MS, mean square; P(MC), probability level after Monte Carlo tests; Pseudo-F, statistic *F*.

1. Pusceddu, et al. (2013) Major consequences of an intense dense shelf water cascading event on deep-sea benthic trophic conditions and meiofaunal biodiversity. *Biogeosciences* 10: 2659–2670.
